# Supplementary material for: Spatially Resolved and Quantitative Analysis of VISTA/PD-1H as a Novel Immunotherapy Target in Human Non–Small Cell Lung Cancer
Source: Oxford University Press journal article supplement (doi:10.1158/1078-0432.ccr-17-2542), 2017-12-04
Supplement: 10780432ccr172542-sup-188639_2_supp_4401700_6zxcnw.docx [file 10780432ccr172542-sup-188639_2_supp_4401700_6zxcnw.docx]

| Supplementary Table S3 | |
| --- | --- |
| Description | Cohort #3  (Yale) |
| Total patients | 139 |
| No mutated | 66 |
| KRAS/EGFR mutated | 73 |
| KRAS mutation | 43 |
| Gly12 | 38 |
| Gly13 | 3 |
| other | 2 |
| EGFR mutation | 30 |
| Exon 18 | 4 |
| Exon 19 | 9 |
| Exon 21 | 17 |
